1

2 **Copy number variation in fungi and its implications for wine yeast**  
3 **genetic diversity and adaptation**

4

5

6 Jacob L. Steenwyk and Antonis Rokas\*

7

8

9 Department of Biological Sciences, Vanderbilt University, Nashville, TN 37235, USA

10

11 \* Correspondence: [antonis.rokas@vanderbilt.edu](mailto:antonis.rokas@vanderbilt.edu)

12

13 **Keywords**

14 Structural variation, alcohol fermentation, sugar metabolism, gene duplication, gene loss,  
15 population genomics

16

17 **Abbreviations**

18 BIR: break-induced recombination

19 CN: copy number

20 HR: homologous recombination

21 NHR: non-homologous repair

22 SNPs: single nucleotide polymorphisms

## 23 **Abstract**

24 In recent years, copy number (CN) variation has emerged as a new and significant source of  
25 genetic polymorphisms contributing to the phenotypic diversity of populations. CN variants are  
26 defined as genetic loci that, due to duplication and deletion, vary in their number of copies across  
27 individuals in a population. CN variants range in size from 50 base pairs to whole chromosomes,  
28 can influence gene activity, and are associated with a wide range of phenotypes in diverse  
29 organisms, including the budding yeast *Saccharomyces cerevisiae*. In this review, we introduce  
30 CN variation, discuss the genetic and molecular mechanisms implicated in its generation, how  
31 they can contribute to genetic and phenotypic diversity in fungal populations, and consider how  
32 CN variants may influence wine yeast adaptation in fermentation-related processes. In particular,  
33 we focus on reviewing recent work investigating the contribution of changes in CN of  
34 fermentation-related genes associated with the adaptation and domestication of yeast wine strains  
35 and offer notable illustrations of such changes, including the high levels of CN variation among  
36 the *CUP* genes, which confer resistance to copper, and the preferential deletion and duplication  
37 of the *MAL1* and *MAL3* loci, respectively, which are responsible for metabolizing maltose and  
38 sucrose. Based on the available data, we propose that CN variation is a substantial dimension of  
39 yeast genetic diversity that occurs largely independent of single nucleotide polymorphisms. As  
40 such, CN variation harbors considerable potential for understanding and manipulating yeast  
41 strains in the wine fermentation environment and beyond.

## 42 **Introduction**

43 Genetic variation in natural populations is shaped by diverse biological processes, such as  
44 genetic drift and natural selection (Chakravarti, 1999), and is, in part, responsible for phenotypic  
45 variation. For example, arginine auxotrophy in the baker's yeast *Saccharomyces cerevisiae* is a  
46 Mendelian inherited trait due to polymorphisms in the *ARG4* locus (Brauer et al., 2006), whereas  
47 variation in *S. cerevisiae* colony morphology is a complex trait driven by variants in several  
48 different genes (Taylor et al., 2016). The aforementioned yeast phenotypes are all caused by  
49 SNPs or small insertions and deletions, which are by far the most well characterized types of  
50 genetic variation not only in yeast, but in any kind of organism (McNally et al., 2009;  
51 Sachidanandam et al., 2001; Schacherer et al., 2009). In recent years, however, several studies in  
52 diverse organisms have revealed that genomes also harbor an abundance of structural variation,  
53 which too contributes to populations' genetic and phenotypic diversity (Stranger et al., 2007;  
54 Zhang et al., 2009).

55  
56 Variation in the structure of chromosomes, or structural variation, encompasses a wide array of  
57 mutations including insertions, inversions, translocations, and copy number (CN) variants (i.e.,  
58 duplications and deletions) (Feuk et al., 2006) and, in humans, accounts for an estimated average  
59 of 74% of the nucleotide differences between two genomes (Rahim et al., 2008). The major  
60 influence of several types of structural variation, such as large-scale inversions, translocations,  
61 and insertions, on phenotype is better understood because many such variants can be  
62 microscopically examined and lead to classic human genetic disorders, such as Down's  
63 syndrome (Gu et al., 2016; Rausch et al., 2012; Youings et al., 2004). In contrast, many CN

64 variants are submicroscopic and eschewed attention until the advent of whole genome  
65 sequencing technologies (Feuk et al., 2006).  
66  
67 CN variants are defined as duplications or deletions that range from 50 base pairs to whole  
68 chromosomes (Figure 1) and can significantly influence phenotypic diversity (Arlt et al., 2014;  
69 Zhang et al., 2009). For example, in humans, the CN of the salivary amylase gene, *AMY1*, is  
70 higher in populations with high-starch diets and correlated with salivary protein abundance  
71 thereby improving digestion of starchy foods (Perry et al., 2007). Levels of CN variation have  
72 been examined in diverse organisms across the tree of life, including animals (e.g., Humans;  
73 *Homo sapiens*: Sudmant et al., 2015, House mouse; *Mus musculus*: Pezer et al., 2015), plants  
74 (e.g., soybean; *Glycine max*: Cook et al., 2012, maize; *Zea mays*: Swanson-Wagner et al., 2010)  
75 and fungi (e.g., *Cryptococcus neoformans*: Hu et al., 2011, *Batrachochytrium dendrobatidis*:  
76 Farrer et al., 2013, *Zymoseptoria tritici*: Hartmann and Croll, 2017).  
77  
78 *S. cerevisiae* has been an important model for genetics, genomics and evolution (Botstein et al.,  
79 1997; Goffeau et al., 1996; Winzeler et al., 1999). Much of what we know about the evolutionary  
80 history of *S. cerevisiae* stems from investigating genome-wide patterns of SNPs among globally  
81 distributed strains. Examination of genome-wide patterns of SNP variation has yielded valuable  
82 insights into yeast function in the wine fermentation environment. For example, 13 SNPs in  
83 *ABZ1*, a gene associated with nitrogen biosynthetic pathways, have been shown to modify the  
84 rate of fermentation and nitrogen utilization during fermentation (Ambroset et al., 2011).  
85

86 Interrogations of genome-wide patterns of SNPs have also shown that industrial clades –  
87 including those of beer, bread, cacao, sake, and wine – often mirror human history (Cromie et al.,  
88 2013; Gallone et al., 2016; Gonçalves et al., 2016; Schacherer et al., 2009; Sicard and Legras,  
89 2011), suggesting that human activity has greatly influenced *S. cerevisiae* genome evolution  
90 (Yue et al., 2017). Furthermore, SNP-based studies have repeatedly found that wine strains of *S.*  
91 *cerevisiae* exhibit low levels of genetic diversity (Borneman et al., 2016; Cromie et al., 2013;  
92 Liti et al., 2009; Schacherer et al., 2009; Sicard and Legras, 2011), consistent with a historical  
93 population bottle-neck event that reduced wine yeast genetic variation. The low SNP diversity  
94 among wine yeast strains has led some to suggest that wine strain development may benefit from  
95 the introduction of genetic variation from yeasts outside the wine clade (Borneman et al., 2016).  
96 However, recent studies examining CN variation among wine associated strains of *S. cerevisiae*  
97 have identified considerable genetic diversity (Gallone et al., 2016; Gonçalves et al., 2016;  
98 Steenwyk and Rokas, 2017), suggesting that standing CN variation in wine strains may be  
99 industrially relevant.

100

101 In the present review, we begin by surveying the molecular mechanisms that lead to CN variant  
102 formation, we next discuss the contribution of CN variation to the genetic and phenotypic  
103 diversity in fungal populations, and close by examining the CN variation in wine yeasts and the  
104 likely phenotypic impact of CN variants in the wine fermentation environment.

## 105 **Copy number variation and the molecular mechanisms that**

## 106 **generate it**

107 Copy number (CN) variants, a class of structural variants, are duplicated or deleted loci that  
108 range from 50 base pairs (bp) to whole chromosomes in length (Figure 1) and have a mutation  
109 rate 100-1,000 times greater than SNPs (Arlt et al., 2014; Sener, 2014; Zhang et al., 2009). CN  
110 variable loci can in turn be broken down into three subclasses (Figure 1) (Estivill and Armengol,  
111 2007). The first subclass encompasses variants that originate via duplications; in the genome,  
112 these can appear as either identical or nearly identical copies, or multi-allelic CN variants (Bailey  
113 and Eichler, 2006; Usher and McCarroll, 2015). The extreme version of this subclass are  
114 chromosomal CN variants that correspond to duplications of entire chromosomes. The second  
115 subclass encompasses CN variants that originate via deletion leading to the loss of the sequence  
116 of a locus in the genome. The third subclass includes complex CN variants where a locus  
117 exhibits a combination of duplication, deletion, insertion, and inversion events (Usher and  
118 McCarroll, 2015).

119  
120 CN variants are commonly generated from aberrant DNA repair via three mechanisms:  
121 homologous recombination (HR), non-homologous repair (NHR), and environmental stimulation  
122 (Figure 2) (Hastings et al., 2009b; Hull et al., 2017). HR is a universal process associated with  
123 DNA repair and requires high sequence similarity across 60 - 300 bps (Hua et al., 1997;  
124 Petukhova et al., 1998). HR is initiated by double-strand breaks caused by ionizing radiation,  
125 reactive oxygen species, and mechanical stress on chromosomes such as those associated with  
126 collapsed or broken replication forks (Aylon and Kupiec, 2004; Hastings et al., 2009b; Khanna  
127 and Jackson, 2001). Improper repair by HR can result in duplication, deletion, or inversion of

128 genetic material (Reams and Roth, 2015). Non-allelic HR (also known as ectopic  
129 recombination), defined as recombination between two different loci of the same or different  
130 chromosomes that share sequence similarity and are  $\geq 300$  base pairs in length, is among the most  
131 well-studied examples of improper repair (Kupiec and Petes, 1988; Prado et al., 2003). Most  
132 evidence of non-allelic HR resulting in CN variation is directly associated with low copy repeats  
133 or transposable elements (Hurles, 2005; Xu and Boeke, 1987). For example, a duplication and  
134 deletion may result during unequal crossing over of homologous sequences (Figure 2a)  
135 (Carvalho and Lupski, 2016). Improper HR may also occur at collapsed or broken replication  
136 forks by break-induced replication (BIR) (Figure 2b). BIR requires 3' strand invasion at the  
137 allelic site of stalled replication to properly restart DNA synthesis (Figure 2bi) (Llorente et al.,  
138 2008), however, template switching, the non-allelic pairing of homologous sequences, in the  
139 backward (Figure 2bii) or forward (Figure 2biii) direction can result in a duplication or deletion,  
140 respectively (Morrow et al., 1997; Smith et al., 2007). Although HR occurs with high fidelity,  
141 errors in the process, which are thought to increase in frequency during mitosis and meiosis, can  
142 generate CN variants (Hastings et al., 2009b).

143  
144 In contrast to HR, NHR utilizes microhomologies (typically defined as ~65% or more sequence  
145 similarity of short sequences up to ten bases long) or does not require homology altogether, and  
146 can too lead to CN variant formation (Daley et al., 2005; McVey and Lee, 2008). NHR can occur  
147 by two mechanisms: non-replicative and replicative (Hastings et al., 2009b). Non-replicative  
148 mechanisms include non-homologous end joining and microhomology-mediated end-joining  
149 (Lieber, 2008; McVey and Lee, 2008). Non-homologous end-joining refers to the direct ligation  
150 of sequences in a double-strand break (Daley et al., 2005). Prior to ligation, there may be a loss

151 of genetic material or the addition of free DNA (e.g., from transposable elements or  
152 mitochondrial DNA) (Yu and Gabriel, 2003). Microhomology-mediated end joining is similar to  
153 non-homologous end-joining but occurs more frequently, requires different enzymes, and  
154 leverages homologies 1-10 base pairs in length to ensure more efficient annealing (Lieber, 2008;  
155 Yu et al., 2004). Non-homologous end-joining and microhomology-mediated non-homologous  
156 end-joining are primarily associated with small insertions and deletions and therefore are not  
157 likely to be a major driver of CN variation (Gu et al., 2008; Yu and Gabriel, 2003). Replicative  
158 mechanisms of CN variant formation include replication slippage, fork stalling, and  
159 microhomology BIR. Replication slippage occurs along repetitive stretches of DNA resulting in  
160 the duplication or deletion of sequence between repetitive regions (Hastings et al., 2009b). Fork  
161 stalling is thought to cause large CNVs of 20 kb average length through template switching  
162 between distal replication forks rather than within a replication fork (Slack et al., 2006).  
163 However, fork stalling without distal template switching can also be highly mutagenic and  
164 induce CN variants (Hull et al., 2017; Paul et al., 2013). Lastly, microhomology-mediated break-  
165 induced replication occurs when the 3' end of a collapsed fork anneals with any single-stranded  
166 template that it shares microhomology with to reinitiate DNA synthesis (Figure 2b) (Hastings et  
167 al., 2009b). Annealing can occur in the backward (Figure 2bii) or forward (Figure 2biii) direction  
168 of the allelic site causing a duplication or deletion, respectively, and is thought to be the primary  
169 cause of low copy repeats (Hastings et al., 2009a).

170

171 The third mechanism is associated with an epigenetic mark that can stimulate the formation of  
172 CN variants. Histone acetylation, specifically H3K56ac, is, in part, environmentally driven  
173 (Turner, 2009), associated with highly transcribed loci, and can promote CN variant formation



174 through repeated fork stalling or template switching (Figure 2c) (Hull et al., 2017). For example,  
175 it has been shown that exposure to environmental copper stimulates the generation of CN  
176 variation in *CUPI*, a gene that is associated with copper resistance when duplicated (Fogel and  
177 Welch, 1982), thereby increasing the likelihood of favorable alleles that exhibit increased copper  
178 resistance (Hull et al., 2017). Similarly, environmental formaldehyde exposure was shown to  
179 stimulate CN variation (Hull et al., 2017) of the *SFAI* gene, which confers formaldehyde  
180 resistance at higher CNs (Wehner et al., 1993). Altogether, these experiments provide insight to  
181 how perturbations of an environmental parameter may stimulate CN variation at a locus  
182 important to adaptation in the new environment (Hull et al., 2017).

183

## 184 **Copy number variation as a source of phenotypic diversity**

185 CN variants can have multiple effects on gene activity, such as changing gene dosage (i.e., gene  
186 CN; Figure 3) and interrupting coding sequences (Itsara et al., 2009; Sener, 2014). These effects  
187 can be substantial; for example, 17.7% of gene expression variation in human populations can be  
188 attributed to CN variants (Stranger et al., 2007). Furthermore, changes in human gene expression  
189 attributed to CN variants have little overlap with changes in gene expression caused by SNPs,  
190 suggesting the two types of variation independently affect gene expression (Stranger et al.,  
191 2007). Additionally, gene CN tends to correlate with levels of both gene expression and protein  
192 abundance (Henrichsen et al., 2009; Perry et al., 2007; Stranger et al., 2007). For example,  
193 changes in gene expression and therefore protein abundance caused by chromosomal CN  
194 variation in human chromosome 21 are thought to contribute to Down syndrome (Aivazidis et  
195 al., 2017; Kahlem et al., 2004).

196

197 **Copy number variation as a source of genetic and phenotypic**  
198 **diversity in fungal populations**

199 CN variant loci contribute to population genetic and phenotypic diversity (Box 1), such as  
200 virulence (Farrer et al., 2013; Hu et al., 2011b), in diverse fungal species, including as the  
201 baker's yeast *Saccharomyces cerevisiae* (ASCOMYCOTA, Saccharomycetes) (Gallone et al.,  
202 2016; Gonçalves et al., 2016; Steenwyk and Rokas, 2017), the fission yeast  
203 *Schizosaccharomyces pombe* (ASCOMYCOTA, Schizosaccharomycetes) (Jeffares et al., 2017),  
204 the human fungal pathogen *Cryptococcus deuterogattii* (BASIDIOMYCOTA, Tremellomycetes)  
205 (previously known as *Cryptococcus gattii* VGII; Steenwyk et al., 2016) and *C. neoformans* (Hu  
206 et al., 2011b), the amphibian pathogen *Batrachochytrium dendrobatidis*  
207 (CHYTRIDIOMYCOTA, Chytridiomycetes) (Farrer et al., 2013), and the wheat pathogen  
208 *Zymoseptoria tritici* (ASCOMYCOTA, Dothideomycetes) (Hartmann and Croll, 2017).

209

210 Importantly, the degree of CN variation (which can be represented by CN variable base pairs per  
211 kilobase) in fungal populations is not always correlated to the degree of SNP variation (which  
212 can be represented by SNPs per kilobase) (Figure 4a). For example, there is no correlation  
213 between CN variable base pairs per kilobase and SNPs per kilobase among *S. cerevisiae* wine  
214 strains (Steenwyk and Rokas, 2017) and a population of *Cryptococcus deuterogattii* (Steenwyk  
215 et al., 2016). Interestingly, both populations harbor low levels of SNP diversity; for *S. cerevisiae*  
216 wine strains this is due to a single domestication-associated bottleneck event (Cromie et al.,  
217 2013; Liti et al., 2009; Schacherer et al., 2009; Sicard and Legras, 2011), whereas for *C.*

218 *deuterogattii* this is because the samples stem from three clonally evolved subpopulations from  
219 the Pacific Northwest, United States (Engelthaler et al., 2014). In contrast, a significant  
220 correlation is observed between CN variable base pairs per kilobase and SNPs per kilobase  
221 among individuals in a globally distributed population of *S. pombe* (Jeffares et al., 2015).  
222  
223 The proportion of the genome exhibiting CN and SNP variation also varies across *S. cerevisiae*,  
224 *S. pombe*, and *C. deuterogattii* populations. For example, CN variable base pairs per kilobase are  
225 significantly different between the three populations (Figure 4b), with the fraction of CN variable  
226 base pairs per kilobase being greatest in *S. cerevisiae*, followed by *C. deuterogattii*, and then *S.*  
227 *pombe*. In contrast, the *S. cerevisiae* population has fewer SNPs per kilobase compared to *S.*  
228 *pombe* but more SNPs per kilobase compared to *C. deuterogattii* (Figure 4b).  
229  
230 How CN variants influence gene expression and phenotype in fungi is not well known.  
231 Examination of the contribution of CN variants to gene expression and phenotypic variation in *S.*  
232 *pombe* shows that partial aneuploidies (i.e., large CN variants) influence both local and global  
233 gene expression (Chikashige et al., 2007); in addition, CN variants are positively correlated with  
234 gene expression changes ( $r_s = 0.71$ ;  $p = 0.01$ ; Spearman rank correlation; reported in Jeffares et  
235 al., 2017). Genome-wide association analyses of numerous phenotypes in *S. pombe* showed that  
236 structural variants accounted for 11% of phenotypic variation (CN variants accounted for 7% of  
237 that variation and rearrangements for 4%; Jeffares et al., 2017). The phenotypes significantly  
238 influenced by CN variants included growth rate, growth in various free amino acids (e.g.,  
239 tryptophan, isoleucine), growth in the presence of various stressors (e.g., hydrogen peroxide,  
240 ultraviolet radiation, minimal media), and sugar utilization in winemaking (Jeffares et al., 2017).

241

242 Although more studies are needed, these findings argue that CN variation may be a substantial  
243 contributor to the total genetic and phenotypic variation of fungal populations. Additionally, the  
244 variation in the correlation between CN and SNP variation across fungal populations (Figure 4)  
245 suggests that levels of SNP variation are not always a good proxy for levels of CN variation.

246

## 247 **Copy number variation and its impact on wine yeast adaptation in** 248 **fermentation-related processes**

249 During the wine making process, *S. cerevisiae* yeasts are barraged with numerous stressors such  
250 as high acidity, ethanol, osmolarity, sulfites, and low levels of oxygen and nutrient availability  
251 (Marsit and Dequin, 2015). Not surprisingly, *S. cerevisiae* strains isolated from wine making  
252 environments tend to be more robust to acid, copper, and sulfite stressors than yeasts isolated  
253 from beer and sake environments (Gallone et al., 2016). These biological differences are, at least  
254 partially, explained by variants, including CN variants, found at different frequencies or uniquely  
255 in wine yeasts. Below, we discuss what is known about the CN profile of genes from *S.*  
256 *cerevisiae* wine yeast strains associated with these stressors that may reflect diversity in stress  
257 tolerance or metabolic capacity and efficiency (Figure 5).

258

259 CN variable genes related to stress

260 Many of the CN variable genes that have been identified among wine strains of *S. cerevisiae*  
261 (Gallone et al., 2016; Gonçalves et al., 2016; Ibáñez et al., 2014; Steenwyk and Rokas, 2017) are  
262 associated with fermentation processes (Table 1), which supports the hypothesis that CN  
263 variation plays a significant role in microbial domestication (Gibbons and Rinker, 2015). For

264 example, *CUPI* is commonly duplicated among wine yeast strains, but not among yeasts in the  
265 closely related natural oak lineage (Almeida et al., 2015). Duplications in *CUPI* have been  
266 shown to confer copper resistance (Warringer et al., 2011) and their occurrence in wine yeast  
267 strains may have been driven by the human use of copper as a fungicide to combat powdery  
268 mildews in vineyards since the 1800's (Almeida et al., 2015; Fay et al., 2004).

269

270 Wine yeasts have also evolved strategies that favor survival in the wine fermentation  
271 environment, such as flocculation. This aggregation of yeast cells is associated with escape from  
272 hypoxic conditions, as it promotes floating and reaching the air-liquid interface where oxidative  
273 metabolism is possible (Fidalgo et al., 2006; Martínez et al., 1997). Flocculation is also favorable  
274 for oenologists as it facilitates yeast removal in post-processing (Soares, 2011) and is associated  
275 with the production of flavor enhancing ester-containing compounds (Pretorius, 2000).

276 Flocculation is controlled by the *FLO* family of genes (Fidalgo et al., 2006; Govender et al.,  
277 2008). Examination of patterns of CN variation in *FLO* gene family members shows frequent  
278 duplications in *FLO11* as well as numerous duplications and deletions in *FLO1*, *FLO5*, *FLO9*,  
279 and *FLO10* (Gallone et al., 2016; Steenwyk and Rokas, 2017). Some of this variation may be  
280 adaptive. For example, partial duplications in the Serine/Threonine-rich hydrophobic region of  
281 *FLO11* are associated with the adaptive phenotype of floating to the air-liquid interface to access  
282 oxygen among “flor” or “sherry” yeasts (Fidalgo et al., 2006). Furthermore, the same partial  
283 duplications have also been observed in the more general wine population (Steenwyk and Rokas,  
284 2017), suggesting that the benefits associated with this phenotype may not be unique to “flor”  
285 yeasts.

286

287 CN variation is also observed in genes related to stuck (incomplete) or sluggish (delayed)  
288 fermentations. Stuck fermentations are caused by a multitude of factors including nitrogen  
289 availability, nutrient transport, and decreased resistance to starvation (Salmon, 1989; Thomsson  
290 et al., 2005). Two genes associated with decrease resistance to starvation, *ADH7* and *AAD3*, are  
291 sometimes duplicated or deleted among wine yeast strains (Steenwyk and Rokas, 2017). Diverse  
292 CN profiles of *ADH7*, an alcohol dehydrogenase that reduces acetaldehyde to ethanol during  
293 glucose fermentation, and *AAD3*, an aryl-alcohol dehydrogenase whose null mutant displays  
294 greater starvation sensitivity (Walker et al., 2014), suggest variable degrees of starvation  
295 sensitivity and therefore fermentation performance. Additionally, wine yeasts are enriched for  
296 duplication in *PDR18* (Gallone et al., 2016), a transporter that aids in resistance to ethanol stress,  
297 one of the traits that differentiates wine from other industrial strains. Another gene associated  
298 with decreased resistance to starvation that also exhibits CN variation is *IMAI* (Steenwyk and  
299 Rokas, 2017), a major isomaltase with glucosidase activity (Teste et al., 2010).

300

301 CN variable genes related to metabolism

302 Nutrient availability and acquisition is a major driving factor of wine fermentation outcome.  
303 Among the most important nutrients dictating the pace and success of wine fermentation is sugar  
304 availability (Marsit and Dequin, 2015). The most abundant fermentable hexose sugars in the  
305 wine environment include glucose and fructose (Marques et al., 2015), whose transport is largely  
306 carried out by genes from the hexose transporter (*HXT*) family (Boles and Hollenberg, 1997). A  
307 reproducible evolutionary outcome of yeasts exposed to glucose-limited environments, which are  
308 reflective of late wine fermentation, is duplication in hexose transporters, such as *HXT6* and  
309 *HXT7* (Brown et al., 1998; Dunham et al., 2002; Gresham et al., 2008, 2010), suggesting that

310 changes in transporter CN are adaptive. Interestingly, the genes from the *HXT* gene family are  
311 highly CN variable among wine yeast strains (Dunn et al., 2012; Steenwyk and Rokas, 2017).  
312 For example, *HXT13*, *HXT15*, and *HXT17* exhibit CN variation among wine strains, *HXT1*,  
313 *HXT6*, *HXT7*, and *HXT16* are more commonly duplicated, and *HXT9* and *HXT11* are more  
314 commonly deleted (Gallone et al., 2016; Steenwyk and Rokas, 2017).  
315  
316 Similarly striking patterns of CN variation are observed for genes associated with maltose  
317 metabolism (Gallone et al., 2016; Gonçalves et al., 2016; Steenwyk and Rokas, 2017). The two  
318 *MAL* loci in the reference genome of *S. cerevisiae* S288C, *MAL1* and *MAL3*, that contain three  
319 genes which encode for a permease (*MALx1*), a maltase (*MALx2*), and a trans-activator (*MALx3*)  
320 (Michels et al., 1992; Naumov et al., 1994). The *MAL* loci are primarily associated with the  
321 metabolism of maltose (Michels et al., 1992) and therefore would be expected to be primarily  
322 deleted among wine yeasts as maltose is in relatively low abundance compared to other sugars  
323 during wine fermentation. As expected, the *MAL1* locus is deleted across many wine yeasts  
324 (Gallone et al., 2016; Gonçalves et al., 2016; Steenwyk and Rokas, 2017). In contrast, the *MAL3*  
325 locus is primarily duplicated among wine yeast strains (Gonçalves et al., 2016; Steenwyk and  
326 Rokas, 2017). Interestingly, part of the *MAL3* locus, *MAL32*, has been demonstrated to be  
327 important for growth on turanose, maltotriose, and sucrose (Brown et al., 2010), which are  
328 present in the wine environment, albeit in small quantities (M. Victoria and M. Carmen, 2013),  
329 suggesting potential function on secondary substrates or perhaps another function.  
330  
331 Equally important as sugar availability in determining fermentation outcome is nitrogen  
332 acquisition (Marsit and Dequin, 2015). Genes associated with amino acid and nitrogen utilization

333 are commonly duplicated among wine yeast strains. Notable examples of such duplications are  
334 the amino acid permeases, *VBA3* and *VBA5* (Gallone et al., 2016), and *PUT1*, a gene that aids in  
335 the recycling or utilization of proline (Ibáñez et al., 2014).

336  
337 CN variation is also observed in genes of the *THI* family, which are involved in thiamine, or  
338 vitamin B<sub>1</sub>, metabolism (Li et al., 2010), another important determinant of wine fermentation  
339 outcome. Several *THI* gene family members are CN variable; *THI5* and *THI12* are typically  
340 deleted, while *THI13* is commonly duplicated (Steenwyk and Rokas, 2017). Expression of *THI5*  
341 is commonly repressed or absent in wine strains, as it is associated with an undesirable rotten-  
342 egg smell and taste in wine (Bartra et al., 2010; Brion et al., 2014). Interestingly, *THI5* is deleted  
343 in greater than 90% of examined wine strains (Steenwyk and Rokas, 2017) but is duplicated in  
344 several other strains of *S. cerevisiae*, as well as in its sister species *S. paradoxus* and the hybrid  
345 species *S. pastorianus* (Wightman and Meacock, 2003).

346

## 347 **Conclusions and perspectives**

348 An emerging body of work suggests that CN variation is an important, largely underappreciated,  
349 dimension of fungal genome biology and evolution (Farrer et al., 2013; Gallone et al., 2016;  
350 Gonçalves et al., 2016; Hartmann and Croll, 2017; Hu et al., 2011a; Steenwyk et al., 2016;  
351 Steenwyk and Rokas, 2017). Not surprisingly, numerous questions remain unresolved. For  
352 example, we have detailed numerous mechanisms that lead to the generation of CN variation but  
353 the relative contribution of each remains unclear. Additionally, both the genomic organization  
354 and genetic architecture of CN variants remain largely unknown. For example, are duplicated



355 copies typically found in the same genomic neighborhood or are they dispersed? Similarly, what  
356 percentage of phenotypic differences among fungal strains is explained by CN variation?

357

358 The same can be said about the role of CN variation in yeast adaptation to the wine fermentation  
359 environment. Comparison of genome-wide patterns of CN variation among yeast populations  
360 responsible for the fermentation of different wines (e.g., white and red) would provide insight to  
361 how human activity has shaped the genome of yeasts associated with particular types of wine.  
362 Additionally, most sequenced wine strains originate from Italy, Australia, or France. Genome  
363 sequencing of yeasts from underrepresented regions (e.g., Africa and the Americas) may provide  
364 further insight to CN variable loci unique to each region and the global diversity of wine yeast  
365 genomes.

366

367 Another major set of questions are associated with examining the impact of CN variable loci at  
368 the different stages of wine fermentation. Insights on how CN variable loci modify gene  
369 expression, protein abundance and in turn fermentation behavior and end-product would be  
370 immensely valuable. A complementary, perhaps more straightforward, approach would be  
371 focused on examining the phenotypic impact of single-gene or gene family CN variants, such as  
372 the ones discussed in previous sections (e.g. genes belonging to the *ADH*, *HXT*, *MAL*, and *VBA*  
373 families; Table 1) on fermentation outcome. Such studies may provide an important bridge  
374 between scientist, oenologist, and wine-maker to enhance fermentation efficiency and  
375 consistency between batches or in the design of new wine flavor profiles.

376

377 Although this review focused solely on the contribution of *S. cerevisiae* CN variation, it is  
378 important to keep in mind that several other yeasts are also part of the wine fermentation  
379 environment. Members of many other wine yeast genera (e.g., *Hanseniaspora*,  
380 *Saccharomycodes*, and *Torulaspota*) are known to modify properties wine fermentation end  
381 product (Ciani and Maccarelli, 1998). Furthermore, recent sequencing projects have made  
382 several non-conventional wine yeast genomes publically available such as several  
383 *Hanseniaspora* species (Seixas et al., 2017; Sternes et al., 2016), *Starmerella bacillaris* (Lemos  
384 Junior et al., 2017), and *Lachancea lanzarotensis* (Sarilar et al., 2015). In-depth sequencing of  
385 populations from these yeast species and others associated with wine will provide insight to  
386 niche specialization within the wine environment as well as greatly enhance our understanding of  
387 CN variation and its role in the ecology and evolution of fungal populations.

## 388 **References**

- 389 Aivazidis, S., Coughlan, C. M., Rauniyar, A. K., Jiang, H., Liggett, L. A., Maclean, K. N., et al.  
390 (2017). The burden of trisomy 21 disrupts the proteostasis network in Down syndrome.  
391 *PLoS One* 12, e0176307. doi:10.1371/journal.pone.0176307.
- 392 Almeida, P., Barbosa, R., Zalar, P., Imanishi, Y., Shimizu, K., Turchetti, B., et al. (2015). A  
393 population genomics insight into the Mediterranean origins of wine yeast domestication.  
394 *Mol. Ecol.* 24, 5412–5427. doi:10.1111/mec.13341.
- 395 Ambroset, C., Petit, M., Brion, C., Sanchez, I., Delobel, P., Guérin, C., et al. (2011). Deciphering  
396 the molecular basis of wine yeast fermentation traits using a combined genetic and genomic  
397 approach. *G3 (Bethesda)*. 1, 263–81. doi:10.1534/g3.111.000422.
- 398 Arlt, M. F., Rajendran, S., Birkeland, S. R., Wilson, T. E., and Glover, T. W. (2014). Copy  
399 number variants are produced in response to low-dose ionizing radiation in cultured cells.  
400 *Environ. Mol. Mutagen.* 55, 103–113. doi:10.1002/em.21840.
- 401 Aylon, Y., and Kupiec, M. (2004). New insights into the mechanism of homologous  
402 recombination in yeast. *Mutat. Res.* 566, 231–248. doi:10.1016/j.mrrev.2003.10.001.
- 403 Bailey, J. a, and Eichler, E. E. (2006). Primate segmental duplications: crucibles of evolution,  
404 diversity and disease. *Nat. Rev. Genet.* 7, 552–64. doi:10.1038/nrg1895.
- 405 Bartra, E., Casado, M., Carro, D., Campamà, C., and Piña, B. (2010). Differential expression of  
406 thiamine biosynthetic genes in yeast strains with high and low production of hydrogen  
407 sulfide during wine fermentation. *J. Appl. Microbiol.* 109, 272–281. doi:10.1111/j.1365-  
408 2672.2009.04652.x.
- 409 Boles, E., and Hollenberg, C. P. (1997). The molecular genetics of hexose transport in yeasts.  
410 *FEMS Microbiol. Rev.* 21, 85–111. doi:10.1016/S0168-6445(97)00052-1.

- 411 Borneman, A. R., Forgan, A. H., Kolouchova, R., Fraser, J. A., and Schmidt, S. A. (2016).  
412 Whole Genome Comparison Reveals High Levels of Inbreeding and Strain Redundancy  
413 Across the Spectrum of Commercial Wine Strains of *Saccharomyces cerevisiae*. *G3*  
414 *Genes/Genomes/Genetics*, g3.115.025692. doi:10.1534/g3.115.025692.
- 415 Botstein, D., Chervitz, S. a., and Cherry, J. M. (1997). Yeast as a Model Organism. *Science* (80-  
416 ). 227, 1259–1260. doi:10.1126/science.277.5330.1259.
- 417 Brauer, M. J., Christianson, C. M., Pai, D. A., and Dunham, M. J. (2006). Mapping novel traits  
418 by array-assisted bulk segregant analysis in *Saccharomyces cerevisiae*. *Genetics* 173, 1813–  
419 1816. doi:10.1534/genetics.106.057927.
- 420 Brion, C., Ambroset, C., Delobel, P., Sanchez, I., and Blondin, B. (2014). Deciphering regulatory  
421 variation of THI genes in alcoholic fermentation indicate an impact of Thi3p on PDC1  
422 expression. *BMC Genomics* 15, 1085. doi:10.1186/1471-2164-15-1085.
- 423 Brown, C. A., Murray, A. W., and Verstrepen, K. J. (2010). Rapid Expansion and Functional  
424 Divergence of Subtelomeric Gene Families in Yeasts. *Curr. Biol.* 20, 895–903.  
425 doi:10.1016/j.cub.2010.04.027.
- 426 Brown, C. J., Todd, K. M., and Rosenzweig, R. F. (1998). Multiple duplications of yeast hexose  
427 transport genes in response to selection in a glucose-limited environment. *Mol. Biol. Evol.*  
428 15, 931–42. doi:10.1093/oxfordjournals.molbev.a026009.
- 429 Carvalho, C. M. B., and Lupski, J. R. (2016). Mechanisms underlying structural variant  
430 formation in genomic disorders. *Nat. Rev. Genet.* 17, 224–238. doi:10.1038/nrg.2015.25.
- 431 Chakravarti, A. (1999). Population genetics - Making sense out of sequence. *Nat. Genet.* 21, 56–  
432 60. doi:10.1038/4482.
- 433 Chikashige, Y., Tsutsumi, C., Okamasa, K., Yamane, M., Nakayama, J., Niwa, O., et al. (2007).

- 434 Gene expression and distribution of Swi6 in partial aneuploids of the fission yeast  
435 *Schizosaccharomyces pombe*. *Cell Struct. Funct.* 32, 149–61. doi:10.1247/csf.07036.
- 436 Ciani, M., and Maccarelli, F. (1998). Oenological properties of non-Saccharomyces yeasts  
437 associated with wine-making. *World J. Microbiol. Biotechnol.* 14, 199–203.  
438 doi:10.1023/A:1008825928354.
- 439 Cook, D. E., Lee, T. G., Guo, X., Melito, S., Wang, K., Bayless, A. M., et al. (2012). Copy  
440 number variation of multiple genes at Rhg1 mediates nematode resistance in soybean.  
441 *Science (80-. )*. 338, 1206–1209. doi:10.1126/science.1228746.
- 442 Cromie, G. a, Hyma, K. E., Ludlow, C. L., Garmendia-Torres, C., Gilbert, T. L., May, P., et al.  
443 (2013). Genomic sequence diversity and population structure of *Saccharomyces cerevisiae*  
444 assessed by RAD-seq. *G3 (Bethesda)*. 3, 2163–71. doi:10.1534/g3.113.007492.
- 445 Daley, J. M., Palmbo, P. L., Wu, D., and Wilson, T. E. (2005). Nonhomologous End Joining in  
446 Yeast. *Annu. Rev. Genet.* 39, 431–451. doi:10.1146/annurev.genet.39.073003.113340.
- 447 Dunham, M. J., Badrane, H., Ferea, T., Adams, J., Brown, P. O., Rosenzweig, F., et al. (2002).  
448 Characteristic genome rearrangements in experimental evolution of *Saccharomyces*  
449 *cerevisiae*. *Proc. Natl. Acad. Sci. U. S. A.* 99, 16144–16149. doi:10.1073/pnas.242624799.
- 450 Dunn, B., Richter, C., Kvitek, D. J., Pugh, T., and Sherlock, G. (2012). Analysis of the  
451 *Saccharomyces cerevisiae* pan-genome reveals a pool of copy number variants distributed  
452 in diverse yeast strains from differing industrial environments. *Genome Res.* 22, 908–924.  
453 doi:10.1101/gr.130310.111.
- 454 Engelthaler, D. M., Hicks, N. D., Gillece, J. D., Roe, C. C., Schupp, J. M., Driebe, E. M., et al.  
455 (2014). *Cryptococcus gattii* in North American Pacific Northwest: whole-population  
456 genome analysis provides insights into species evolution and dispersal. *MBio* 5, e01464-14.

- 457 doi:10.1128/mBio.01464-14.
- 458 Estivill, X., and Armengol, L. (2007). Copy number variants and common disorders: Filling the  
459 gaps and exploring complexity in genome-wide association studies. *PLoS Genet.* 3, 1787–  
460 1799. doi:10.1371/journal.pgen.0030190.
- 461 Farrer, R. A., Henk, D. A., Garner, T. W., Balloux, F., Woodhams, D. C., and Fisher, M. C.  
462 (2013). Chromosomal copy number variation, selection and uneven rates of recombination  
463 reveal cryptic genome diversity linked to pathogenicity. *PLoS Genet* 9, e1003703.  
464 doi:10.1371/journal.pgen.1003703.
- 465 Fay, J. C., McCullough, H. L., Sniegowski, P. D., and Eisen, M. B. (2004). Population genetic  
466 variation in gene expression is associated with phenotypic variation in *Saccharomyces*  
467 *cerevisiae*. *Genome Biol.* 5, R26. doi:10.1186/gb-2004-5-4-r26.
- 468 Felsenstein, J. (1976). The Theoretical Population Genetics of Variable Selection and Migration.  
469 *Annu. Rev. Genet.* 10, 253–280. doi:10.1146/annurev.ge.10.120176.001345.
- 470 Feuk, L., Carson, A. R., and Scherer, S. W. (2006). Structural variation in the human genome.  
471 *Nat Rev Genet* 7, 85–97. doi:10.1038/nrg1767.
- 472 Fidalgo, M., Barrales, R. R., Ibeas, J. I., and Jimenez, J. (2006). Adaptive evolution by mutations  
473 in the FLO11 gene. *Proc. Natl. Acad. Sci. U. S. A.* 103, 11228–33.  
474 doi:10.1073/pnas.0601713103.
- 475 Fogel, S., and Welch, J. W. (1982). Tandem gene amplification mediates copper resistance in  
476 yeast. *Proc. Natl. Acad. Sci. USA* 79, 5342–5346. doi:10.1073/pnas.79.17.5342.
- 477 Gallone, B., Steensels, J., Prahl, T., Soriaga, L., Saels, V., Herrera-Malaver, B., et al. (2016).  
478 Domestication and Divergence of *Saccharomyces cerevisiae* Beer Yeasts. *Cell* 166, 1397–  
479 1410.e16. doi:10.1016/j.cell.2016.08.020.

- 480 Gibbons, J. G., and Rinker, D. C. (2015). The genomics of microbial domestication in the  
481 fermented food environment. *Curr. Opin. Genet. Dev.* 35, 1–8.  
482 doi:10.1016/j.gde.2015.07.003.
- 483 Goffeau, A., Barrell, B. G., Bussey, H., Davis, R. W., Dujon, B., Feldmann, H., et al. (1996).  
484 Life with 6000 Genes. *Science (80-. )*. 274, 546–567. doi:10.1126/science.274.5287.546.
- 485 Gonçalves, M., Pontes, A., Almeida, P., Barbosa, R., Serra, M., Libkind, D., et al. (2016).  
486 Distinct Domestication Trajectories in Top-Fermenting Beer Yeasts and Wine Yeasts. *Curr.*  
487 *Biol.* 26, 2750–2761. doi:http://dx.doi.org/10.1016/j.cub.2016.08.040.
- 488 Govender, P., Domingo, J. L., Bester, M. C., Pretorius, I. S., and Bauer, F. F. (2008). Controlled  
489 expression of the dominant flocculation genes FLO1, FLO5, and FLO11 in *Saccharomyces*  
490 *cerevisiae*. *Appl. Environ. Microbiol.* 74, 6041–6052. doi:10.1128/AEM.00394-08.
- 491 Gresham, D., Desai, M. M., Tucker, C. M., Jenq, H. T., Pai, D. A., Ward, A., et al. (2008). The  
492 repertoire and dynamics of evolutionary adaptations to controlled nutrient-limited  
493 environments in yeast. *PLoS Genet.* 4. doi:10.1371/journal.pgen.1000303.
- 494 Gresham, D., Usaite, R., Germann, S. M., Lisby, M., Botstein, D., and Regenberg, B. (2010).  
495 Adaptation to diverse nitrogen-limited environments by deletion or extrachromosomal  
496 element formation of the GAP1 locus. *Proc. Natl. Acad. Sci. U. S. A.* 107, 18551–18556.  
497 doi:10.1073/pnas.1014023107.
- 498 Gu, S., Szafranski, P., Akdemir, Z. C., Yuan, B., Cooper, M. L., Magriñá, M. A., et al. (2016).  
499 Mechanisms for Complex Chromosomal Insertions. *PLoS Genet.* 12.  
500 doi:10.1371/journal.pgen.1006446.
- 501 Gu, W., Zhang, F., and Lupski, J. R. (2008). Mechanisms for human genomic rearrangements.  
502 *Pathogenetics* 1, 4. doi:10.1186/1755-8417-1-4.

- 503 Hartmann, F. E., and Croll, D. (2017). Distinct Trajectories of Massive Recent Gene Gains and  
504 Losses in Populations of a Microbial Eukaryotic Pathogen. *Mol. Biol. Evol.*  
505 doi:10.1093/molbev/msx208.
- 506 Hastings, P. J., Ira, G., and Lupski, J. R. (2009a). A microhomology-mediated break-induced  
507 replication model for the origin of human copy number variation. *PLoS Genet.* 5.  
508 doi:10.1371/journal.pgen.1000327.
- 509 Hastings, P. J., Lupski, J. R., Rosenberg, S. M., and Ira, G. (2009b). Mechanisms of change in  
510 gene copy number. *Nat. Rev. Genet.* 10, 551–564. doi:10.1038/nrg2593.
- 511 Henrichsen, C. N., Vinckenbosch, N., Zöllner, S., Chaignat, E., Pradervand, S., Schütz, F., et al.  
512 (2009). Segmental copy number variation shapes tissue transcriptomes. *Nat. Genet.* 41,  
513 424–429. doi:10.1038/ng.345.
- 514 Hu, G., Wang, J., Choi, J., Jung, W. H., Liu, I., Litvintseva, A. P., et al. (2011a). Variation in  
515 chromosome copy number influences the virulence of *Cryptococcus neoformans* and occurs  
516 in isolates from AIDS patients. *BMC Genomics* 12, 526. doi:10.1186/1471-2164-12-526.
- 517 Hu, G., Wang, J., Choi, J., Jung, W. H., Liu, I., Litvintseva, A. P., et al. (2011b). Variation in  
518 chromosome copy number influences the virulence of *Cryptococcus neoformans* and occurs  
519 in isolates from AIDS patients. *BMC Genomics* 12, 526. doi:10.1186/1471-2164-12-526.
- 520 Hua, S., Qiu, M., Chan, E., Zhu, L., and Luo, Y. (1997). Minimum Length of Sequence  
521 Homology Required for *In Vivo* Cloning by Homologous Recombination in Yeast. *Plasmid*  
522 38, 91–96. doi:http://dx.doi.org/10.1006/plas.1997.1305.
- 523 Hull, R. M., Cruz, C., Jack, C. V., Houseley, J., Noronha, M., and Calderon, L. (2017).  
524 Environmental change drives accelerated adaptation through stimulated copy number  
525 variation. *PLOS Biol.* 15, e2001333. doi:10.1371/journal.pbio.2001333.



- 526 Hurles, M. (2005). How homologous recombination generates a mutable genome. *Hum.*  
527 *Genomics* 2, 179. doi:10.1186/1479-7364-2-3-179.
- 528 Ibáñez, C., Pérez-Torrado, R., Chiva, R., Guillamón, J. M., Barrio, E., and Querol, A. (2014).  
529 Comparative genomic analysis of *Saccharomyces cerevisiae* yeasts isolated from  
530 fermentations of traditional beverages unveils different adaptive strategies. *Int. J. Food*  
531 *Microbiol.* 171, 129–135. doi:10.1016/j.ijfoodmicro.2013.10.023.
- 532 Itsara, A., Cooper, G. M., Baker, C., Girirajan, S., Li, J., Absher, D., et al. (2009). Population  
533 Analysis of Large Copy Number Variants and Hotspots of Human Genetic Disease. *Am. J.*  
534 *Hum. Genet.* 84, 148–161. doi:10.1016/j.ajhg.2008.12.014.
- 535 Jeffares, D. C., Jolly, C., Hoti, M., Speed, D., Shaw, L., Rallis, C., et al. (2017). Transient  
536 structural variations have strong effects on quantitative traits and reproductive isolation in  
537 fission yeast. *Nat. Commun.* 8, 14061. doi:10.1038/ncomms14061.
- 538 Jeffares, D. C., Rallis, C., Rieux, A., Speed, D., Převorovský, M., Mourier, T., et al. (2015). The  
539 genomic and phenotypic diversity of *Schizosaccharomyces pombe*. *Nat. Genet.* 47, 235–41.  
540 doi:10.1038/ng.3215.
- 541 Kahlem, P., Sultan, M., Herwig, R., Steinfath, M., Balzereit, D., Eppens, B., et al. (2004).  
542 Transcript level alterations reflect gene dosage effects across multiple tissues in a mouse  
543 model of Down syndrome. *Genome Res.* 14, 1258–1267. doi:10.1101/gr.1951304.
- 544 Khanna, K. K., and Jackson, S. P. (2001). DNA double-strand breaks: signaling, repair and the  
545 cancer connection. *Nat. Genet.* 27, 247–54. doi:10.1038/85798.
- 546 Kupiec, M., and Petes, T. D. (1988). Allelic and ectopic recombination between Ty elements in  
547 yeast. *Genetics* 119, 549–559.
- 548 Lemos Junior, W. J. F., Treu, L., da Silva Duarte, V., Carlot, M., Nadai, C., Campanaro, S., et al.

- 549 (2017). Whole-Genome Sequence of *Starmerella bacillaris* PAS13, a Nonconventional  
550 Enological Yeast with Antifungal Activity. *Genome Announc.* 5, e00788-17.  
551 doi:10.1128/genomeA.00788-17.
- 552 Li, M., Petteys, B. J., McClure, J. M., Valsakumar, V., Bekiranov, S., Frank, E. L., et al. (2010).  
553 Thiamine biosynthesis in *Saccharomyces cerevisiae* is regulated by the NAD<sup>+</sup>-dependent  
554 histone deacetylase Hst1. *Mol. Cell. Biol.* 30, 3329–41. doi:10.1128/MCB.01590-09.
- 555 Lieber, M. R. (2008). The mechanism of human nonhomologous DNA end joining. *J. Biol.*  
556 *Chem.* 283, 1–5. doi:10.1074/jbc.R700039200.
- 557 Liti, G., Carter, D. M., Moses, A. M., Warringer, J., Parts, L., James, S. A., et al. (2009).  
558 Population genomics of domestic and wild yeasts. *Nature* 458, 337–41.  
559 doi:10.1038/nature07743.
- 560 Llorente, B., Smith, C. E., and Symington, L. S. (2008). Break-induced replication: What is it  
561 and what is it for? *Cell Cycle* 7, 859–864. doi:10.4161/cc.7.7.5613.
- 562 M.Victoria, M.-A., and M. Carmen, P. (2013). Wine Chemistry and Biochemistry. *J. Chem. Inf.*  
563 *Model.* 53, 1689–1699. doi:10.1017/CBO9781107415324.004.
- 564 Marques, W. L., Raghavendran, V., Stambuk, B. U., and Gombert, A. K. (2015). Sucrose and  
565 *Saccharomyces cerevisiae*: A relationship most sweet. *FEMS Yeast Res.* 16.  
566 doi:10.1093/femsyr/fov107.
- 567 Marsit, S., and Dequin, S. (2015). Diversity and adaptive evolution of *Saccharomyces* wine  
568 yeast: a review. *FEMS Yeast Res.*, 1–12. doi:10.1093/femsyr/fov067.
- 569 Martínez, P., Pérez Rodríguez, L., and Benítez, T. (1997). Velum Formation by Flor Yeasts  
570 Isolated From Sherry Wine. *Am. J. Enol. Vitic.* 48.
- 571 McNally, K. L., Childs, K. L., Bohnert, R., Davidson, R. M., Zhao, K., Ulat, V. J., et al. (2009).

- 572 Genomewide SNP variation reveals relationships among landraces and modern varieties of  
573 rice. *Proc. Natl. Acad. Sci. U. S. A.* 106, 12273–8. doi:10.1073/pnas.0900992106.
- 574 McVey, M., and Lee, S. E. (2008). MMEJ repair of double-strand breaks (director’s cut): deleted  
575 sequences and alternative endings. *Trends Genet.* 24, 529–538.  
576 doi:10.1016/j.tig.2008.08.007.
- 577 Michels, C. A., Read, E., Nat, K., and Charron, M. J. (1992). The telomere-associated MAL3  
578 locus of *Saccharomyces* is a tandem array of repeated genes. *Yeast* 8, 655–665. Available  
579 at:  
580 [http://www.ncbi.nlm.nih.gov/entrez/query.fcgi?cmd=Retrieve&db=PubMed&dopt=Citation](http://www.ncbi.nlm.nih.gov/entrez/query.fcgi?cmd=Retrieve&db=PubMed&dopt=Citation&list_uids=1441745)  
581 [http://www.ncbi.nlm.nih.gov/entrez/query.fcgi?cmd=Retrieve&db=PubMed&dopt=Citation](http://www.ncbi.nlm.nih.gov/entrez/query.fcgi?cmd=Retrieve&db=PubMed&dopt=Citation&list_uids=1441745)  
&list\_uids=1441745.
- 582 Moritz, C. (1994). Defining “Evolutionarily Significant Units” for conservation. *Trends Ecol.*  
583 *Evol.* 9, 373–375. doi:10.1016/0169-5347(94)90057-4.
- 584 Morrow, D. M., Connelly, C., and Hieter, P. (1997). “Break copy” duplication: A model for  
585 chromosome fragment formation in *saccharomyces cerevisiae*. *Genetics* 147, 371–382.
- 586 Naumov, G. I., Naumova, E. S., and Michels, C. A. (1994). Genetic variation of the repeated  
587 MAL loci in natural populations of *Saccharomyces cerevisiae* and *Saccharomyces*  
588 *paradoxus*. *Genetics* 136, 803–12. Available at:  
589 <http://www.ncbi.nlm.nih.gov/pubmed/8005435> [Accessed September 19, 2016].
- 590 Paul, S., Million-Weaver, S., Chattopadhyay, S., Sokurenko, E., and Merrikh, H. (2013).  
591 Accelerated gene evolution through replication–transcription conflicts. *Nature* 495, 512–  
592 515. doi:10.1038/nature11989.
- 593 Perry, G. H., Dominy, N. J., Claw, K. G., Lee, A. S., Fiegler, H., Redon, R., et al. (2007). Diet  
594 and the evolution of human amylase gene copy number variation. *Nat Genet* 39, 1256–

- 595 1260. doi:10.1038/ng2123.
- 596 Petukhova, G., Stratton, S., and Sung, P. (1998). Catalysis of homologous DNA pairing by yeast  
597 Rad51 and Rad54 proteins. *Nature* 393, 91–94. doi:10.1038/30037.
- 598 Pezer, Z., Harr, B., Teschke, M., Babiker, H., and Tautz, D. (2015). Divergence patterns of genic  
599 copy number variation in natural populations of the house mouse (*Mus musculus*  
600 domesticus) reveal three conserved genes with major population-specific expansions.  
601 *Genome Res* 25, 1114–1124. doi:10.1101/gr.187187.114.
- 602 Prado, F., Cortés-Ledesma, F., Huertas, P., and Aguilera, A. (2003). Mitotic recombination in  
603 *Saccharomyces cerevisiae*. *Curr. Genet.* 42, 185–198. doi:10.1007/s00294-002-0346-3.
- 604 Pretorius, I. S. (2000). Tailoring wine yeast for the new millennium: Novel approaches to the  
605 ancient art of winemaking. *Yeast* 16, 675–729. doi:10.1002/1097-  
606 0061(20000615)16:8<675::AID-YEA585>3.0.CO;2-B.
- 607 Rahim, N. G., Harismendy, O., Topol, E. J., and Frazer, K. A. (2008). Genetic determinants of  
608 phenotypic diversity in humans. *Genome Biol.* 9, 215. doi:10.1186/gb-2008-9-4-215.
- 609 Rausch, T., Jones, D. T. W., Zapatka, M., Stütz, A. M., Zichner, T., Weischenfeldt, J., et al.  
610 (2012). Genome sequencing of pediatric medulloblastoma links catastrophic DNA  
611 rearrangements with TP53 mutations. *Cell* 148, 59–71. doi:10.1016/j.cell.2011.12.013.
- 612 Reams, A. B., and Roth, J. R. (2015). Mechanisms of gene duplication and amplification. *Cold*  
613 *Spring Harb. Perspect. Biol.* 7. doi:10.1101/cshperspect.a016592.
- 614 Sachidanandam, R., Weissman, D., Schmidt, S. C., Kakol, J. M., Stein, L. D., Marth, G., et al.  
615 (2001). A map of human genome sequence variation containing 1.42 million single  
616 nucleotide polymorphisms. *Nature* 409, 928–933. doi:10.1038/35057149.
- 617 Salmon, J. M. (1989). Effect of sugar transport inactivation in *Saccharomyces cerevisiae* on

- 618 sluggish and stuck enological fermentations. *Appl. Environ. Microbiol.* 55, 953–958.
- 619 Sarilar, V., Devillers, H., Freel, K. C., Schacherer, J., and Neuvéglise, C. (2015). Draft Genome  
620 Sequence of *Lachancea lanzarotensis* CBS 12615 T , an Ascomycetous Yeast Isolated from  
621 Grapes. *Genome Announc.* 3, e00292-15. doi:10.1128/genomeA.00292-15.
- 622 Schacherer, J., Shapiro, J. a, Ruderfer, D. M., and Kruglyak, L. (2009). Comprehensive  
623 polymorphism survey elucidates population structure of *Saccharomyces cerevisiae*. *Nature*  
624 458, 342–5. doi:10.1038/nature07670.
- 625 Seixas, I., Barbosa, C., Salazar, S. B., Mendes-Faia, A., Wang, Y., Güldener, U., et al. (2017).  
626 Genome Sequence of the Nonconventional Wine Yeast *Hanseniaspora guilliermondii*  
627 UTAD222. *Genome Announc.* 5, e01515-16. doi:10.1128/genomeA.01515-16.
- 628 Sener, E. F. (2014). Association of Copy Number Variations in Autism Spectrum Disorders: A  
629 Systematic Review. *Chinese J. Biol.* 2014, 1–9. doi:10.1155/2014/713109.
- 630 Sicard, D., and Legras, J. L. (2011). Bread, beer and wine: Yeast domestication in the  
631 *Saccharomyces sensu stricto* complex. *Comptes Rendus - Biol.* 334, 229–236.  
632 doi:10.1016/j.crv.2010.12.016.
- 633 Slack, A., Thornton, P. C., Magner, D. B., Rosenberg, S. M., and Hastings, P. J. (2006). On the  
634 mechanism of gene amplification induced under stress in *Escherichia coli*. *PLoS Genet.* 2,  
635 385–398. doi:10.1371/journal.pgen.0020048.
- 636 Smith, C. E., Llorente, B., and Symington, L. S. (2007). Template switching during break-  
637 induced replication. *Nature* 447, 102–105. doi:10.1038/nature05723.
- 638 Soares, E. V. (2011). Flocculation in *Saccharomyces cerevisiae*: A review. *J. Appl. Microbiol.*  
639 110, 1–18. doi:10.1111/j.1365-2672.2010.04897.x.
- 640 Steenwyk, J. L., Soghigian, J. S., Perfect, J. R., and Gibbons, J. G. (2016). Copy number

641 variation contributes to cryptic genetic variation in outbreak lineages of *Cryptococcus gattii*  
642 from the North American Pacific Northwest. *BMC Genomics* 17, 700. doi:10.1186/s12864-  
643 016-3044-0.

644 Steenwyk, J., and Rokas, A. (2017). Extensive Copy Number Variation in Fermentation-Related  
645 Genes Among *Saccharomyces cerevisiae* Wine Strains. *G3 Genes, Genomes, Genet.* 7.  
646 Available at: <http://www.g3journal.org/content/7/5/1475#ref-25> [Accessed July 3, 2017].

647 Sternes, P. R., Lee, D., Kutyna, D. R., and Borneman, A. R. (2016). Genome Sequences of Three  
648 Species of *Hanseniaspora* Isolated from Spontaneous Wine Fermentations. *Genome*  
649 *Announc.* 4, e01287-16. doi:10.1128/genomeA.01287-16.

650 Stranger, B. E., Forrest, M. S., Dunning, M., Ingle, C. E., Beazley, C., Thorne, N., et al. (2007).  
651 Relative impact of nucleotide and copy number variation on gene expression phenotypes.  
652 *Science* 315, 848–853. doi:10.1126/science.1136678.

653 Sudmant, P. H., Mallick, S., Nelson, B. J., Hormozdiari, F., Krumm, N., Huddleston, J., et al.  
654 (2015). Global diversity, population stratification, and selection of human copy-number  
655 variation. *Science* (80-. ). 349, aab3761. doi:10.1126/science.aab3761.

656 Swanson-Wagner, R. A., Eichten, S. R., Kumari, S., Tiffin, P., Stein, J. C., Ware, D., et al.  
657 (2010). Pervasive gene content variation and copy number variation in maize and its  
658 undomesticated progenitor. *Genome Res.* 20, 1689–1699. doi:10.1101/gr.109165.110.

659 Taylor, M. B., Phan, J., Lee, J. T., McCadden, M., and Ehrenreich, I. M. (2016). Diverse genetic  
660 architectures lead to the same cryptic phenotype in a yeast cross. *Nat. Commun.* 7.  
661 doi:10.1038/ncomms11669.

662 Teste, M. A., Marie François, J., and Parrou, J. L. (2010). Characterization of a new multigene  
663 family encoding isomaltases in the yeast *Saccharomyces cerevisiae*, the IMA family. *J.*

- 664 *Biol. Chem.* 285, 26815–26824. doi:10.1074/jbc.M110.145946.
- 665 Thomsson, E., Gustafsson, L., and Larsson, C. (2005). Starvation response of *Saccharomyces*  
666 *cerevisiae* grown in anaerobic nitrogen- or carbon-limited chemostat cultures. *Appl.*  
667 *Environ. Microbiol.* 71, 3007–3013. doi:10.1128/AEM.71.6.3007-3013.2005.
- 668 Turner, B. M. (2009). Epigenetic responses to environmental change and their evolutionary  
669 implications. *Philos. Trans. R. Soc. Lond. B. Biol. Sci.* 364, 3403–3418.  
670 doi:10.1098/rstb.2009.0125.
- 671 Usher, C. L., and McCarroll, S. A. (2015). Complex and multi-allelic copy number variation in  
672 human disease. *Brief. Funct. Genomics* 14, 329–338. doi:10.1093/bfpgp/elv028.
- 673 Walker, M. E., Nguyen, T. D., Liccioli, T., Schmid, F., Kalatzis, N., Sundstrom, J. F., et al.  
674 (2014). Genome-wide identification of the Fermentome; genes required for successful and  
675 timely completion of wine-like fermentation by *Saccharomyces cerevisiae*. *BMC Genomics*  
676 15, 552. doi:10.1186/1471-2164-15-552.
- 677 Warringer, J., Zörgö, E., Cubillos, F. A., Zia, A., Gjuvsland, A., Simpson, J. T., et al. (2011).  
678 Trait Variation in Yeast Is Defined by Population History. *PLoS Genet* 7, e1002111+.  
679 doi:10.1371/journal.pgen.1002111.
- 680 Wehner, E. P., Rao, E., and Brendel, M. (1993). Molecular structure and genetic regulation of  
681 SFA, a gene responsible for resistance to formaldehyde in *Saccharomyces cerevisiae*, and  
682 characterization of its protein product. *Mol. Gen. Genet.* 237, 351–8. Available at:  
683 <http://www.ncbi.nlm.nih.gov/pubmed/8483449>.
- 684 Wightman, R., and Meacock, P. A. (2003). The THI5 gene family of *Saccharomyces cerevisiae*:  
685 distribution of homologues among the hemiascomycetes and functional redundancy in the  
686 aerobic biosynthesis of thiamin from pyridoxine. *Microbiology* 149, 1447–1460.

- 687       doi:10.1099/mic.0.26194-0.
- 688   Winzeler, E. A., Shoemaker, D. D., Astromoff, A., Liang, H., Anderson, K., Andre, B., et al.  
689       (1999). Functional characterization of the *S-cerevisiae* genome by gene deletion and parallel  
690       analysis. *Science* (80-. ). 285, 901–906. doi:10.1126/science.285.5429.901.
- 691   Xu, H., and Boeke, J. D. (1987). High-frequency deletion between homologous sequences during  
692       retrotransposition of Ty elements in *Saccharomyces cerevisiae*. *Proc. Natl. Acad. Sci. U. S.*  
693       *A.* 84, 8553–8557. doi:10.1073/pnas.84.23.8553.
- 694   Youings, S., Ellis, K., Ennis, S., Barber, J., and Jacobs, P. (2004). A study of reciprocal  
695       translocations and inversions detected by light microscopy with special reference to origin,  
696       segregation, and recurrent abnormalities. *Am. J. Med. Genet. A* 126A, 46–60.  
697       doi:10.1002/ajmg.a.20553.
- 698   Yu, J., Marshall, K., Yamaguchi, M., Haber, J. E., and Weil, C. F. (2004). Microhomology-  
699       Dependent End Joining and Repair of Transposon-Induced DNA Hairpins by Host Factors  
700       in *Saccharomyces cerevisiae*. *Mol. Cell. Biol.* 24, 1351–1364. doi:10.1128/MCB.24.3.1351-  
701       1364.2004.
- 702   Yu, X., and Gabriel, A. (2003). Ku-dependent and Ku-independent end-joining pathways lead to  
703       chromosomal rearrangements during double-strand break repair in *Saccharomyces*  
704       *cerevisiae*. *Genetics* 163, 843–856.
- 705   Yue, J. X., Li, J., Aigrain, L., Hallin, J., Persson, K., Oliver, K., et al. (2017). Contrasting  
706       evolutionary genome dynamics between domesticated and wild yeasts. *Nat. Genet.* 49, 913–  
707       924. doi:10.1038/ng.3847.
- 708   Zhang, F., Gu, W., Hurles, M. E., and Lupski, J. R. (2009). Copy number variation in human  
709       health, disease, and evolution. *Annu Rev Genomics Hum Genet* 10, 451–481.



710        doi:10.1146/annurev.genom.9.081307.164217.

711

712 **Table 1. Genes associated with fermentation-related processes that**  
 713 **exhibit CN variation among *S. cerevisiae* wine strains**

| <b>Process<br/>(organized<br/>alphabetically)</b> | <b>Gene</b>                          | <b>Primarily<br/>duplicated, deleted,<br/>or both</b> | <b>Reference<br/>(organized<br/>alphabetically)</b>                                                            |
|---------------------------------------------------|--------------------------------------|-------------------------------------------------------|----------------------------------------------------------------------------------------------------------------|
| Amino acid & nitrogen utilization                 | <i>VBA3, VBA5, PUT1</i>              | Duplicated                                            | Gallone <i>et al.</i> 2016;<br>Ibáñez <i>et al.</i> 2013                                                       |
| Cu and Fe homeostasis                             | <i>CUP1, CUP2</i>                    | Both                                                  | Almeida <i>et al.</i> 2015;<br>Fay <i>et al.</i> 2004;<br>Steenwyk & Rokas, 2017; Warringer <i>et al.</i> 2011 |
|                                                   | <i>FIT2, FIT3, FRE3</i>              | Duplicated                                            | Gallone <i>et al.</i> 2016                                                                                     |
| Ethanol resistance and production                 | <i>PDR18</i>                         |                                                       | Gallone <i>et al.</i> 2016                                                                                     |
|                                                   | <i>ADH7</i>                          | Both                                                  | Steenwyk & Rokas, 2017                                                                                         |
| Flocculation                                      | <i>FLO11</i>                         | Duplicated                                            | Steenwyk & Rokas, 2017                                                                                         |
|                                                   | <i>FLO1, FLO5, FLO9, FLO10</i>       | Both                                                  | Gallone <i>et al.</i> 2016;<br>Steenwyk & Rokas, 2017                                                          |
| Hexose transport                                  | <i>HXT1, HXT4, HXT6, HXT7, HXT16</i> | Duplicated                                            | Gallone <i>et al.</i> 2016;<br>Steenwyk & Rokas, 2017                                                          |
|                                                   | <i>HXT9, HXT11</i>                   | Deleted                                               | Gallone <i>et al.</i> 2016;<br>Steenwyk & Rokas, 2017                                                          |
|                                                   | <i>HXT13, HXT15,</i>                 | Both                                                  | Gallone <i>et al.</i> 2016;                                                                                    |

|                     |                                |            |                                                                                  |
|---------------------|--------------------------------|------------|----------------------------------------------------------------------------------|
|                     | <i>HXT17</i>                   |            | Steenwyk & Rokas, 2017                                                           |
| Maltose metabolism  | <i>MAL3x, MPH3, YPR196W</i>    | Duplicated | Gallone <i>et al.</i> 2016; Gonçalves <i>et al.</i> 2016; Steenwyk & Rokas, 2017 |
|                     | <i>MAL1x, IMA2, IMA4, IMA5</i> | Deleted    | Gallone <i>et al.</i> 2016; Gonçalves <i>et al.</i> 2016; Steenwyk & Rokas, 2017 |
|                     | <i>MPH2, IMA1, IMA3</i>        | Both       | Gallone <i>et al.</i> 2016; Steenwyk & Rokas, 2017                               |
| Thiamine metabolism | <i>THI3</i>                    | Duplicated | Steenwyk & Rokas, 2017                                                           |
|                     | <i>THI5, THI2</i>              | Deleted    | Steenwyk & Rokas, 2017                                                           |

714

## 715 **Figure legends**

716 **Figure 1. The different types of CN variation.** CN variants range in size (50 base pairs or  
717 greater) to whole chromosomes, and are identified through comparison to a reference genome. In  
718 this cartoon, a reference chromosome containing two highlighted loci, in blue and orange, is  
719 shown on top. The second chromosome illustrates an example of a segmental duplication CN, in  
720 which there are two copies of the blue locus. The third chromosome illustrates an example of a  
721 multiallelic CN variant, where the duplicated locus contains 3 or more copies. The fourth pair of  
722 chromosomes illustrates a CN variant associated with the duplication of an entire chromosome.  
723 Finally, the last two chromosomes illustrate deletion and complex CN variants, respectively;  
724 deletion CN variants are associated with loci that are not present relative to the reference, and  
725 complex CN variants refer to a combination of duplications, deletions, insertions, and/or  
726 inversions relative to the reference.

727

728 **Figure 2. Mechanisms of CN variant formation.** CN variants typically occur as a result of  
729 aberrant replication via homologous recombination, non-homology based mechanisms, and  
730 environmentally stimulated processes. (a) Unequal crossing over during recombination may  
731 result in duplication and deletion. Here, two equal strands of DNA with two genes (represented  
732 by the orange or blue arrows) have undergone unequal crossing over due to the misalignment of  
733 a homologous sequence. This results in one DNA strand having three genes and the other one  
734 gene. (b and c) A major driver of CN variant formation is aberrant DNA replication. (b, top)  
735 Double strand breaks at replication forks or collapsed forks are often repaired via Break-induced  
736 replication (BIR). (bi) Proper BIR starts with strand invasion of a homologous or  
737 microhomologous sequence (shown in red) to allow for proper fork restart. (bii) If template

738 switching occurs in the backward direction, a segment of DNA will have been replicated twice  
739 resulting in a duplication; (biii) in contrast, template switching in the forward direction results in  
740 a deletion represented by a dashed line in the DNA sequence. Erroneous BIR may be mediated  
741 by microhomologies as well. (c) CN variants may be stimulated near genes that are highly  
742 expressed due to an increased chance of fork stalling. (ci) If a replication fork breaks down near  
743 a gene that is not expressed (grey) and restarts once (represented by one black arrow), no  
744 mutation will occur. (cii) If a replication fork breaks down near a gene that is expressed (green)  
745 with cryptic unstable transcripts (red) then there may be two outcomes dependent on the degree  
746 of the H3K56ac acetylation mark. If there are low levels of H3K56ac, it is more likely that there  
747 will be proper fork restart by BIR (represented by one black arrow). If there are high levels of  
748 H3K56ac, it is more likely that there will be repeated fork stalling (represented by three black  
749 arrows) (see figure 8 from Hull *et al.* 2017).

750

751 **Figure 3. CN variation can alter gene expression.** (a) Consider a gene whose CN ranges from  
752 0 to 4 (blue to black to red) among individuals (represented by dots) in a population (middle  
753 gene). (b) Generally, CN and gene expression (represented as arbitrary units or a.u.) correlate  
754 with one another such that individuals with lower CN values will have lower levels of gene  
755 expression of that gene while those with higher CN values will have higher levels of gene  
756 expression.

757

758 **Figure 4. Comparison of genomic content affected by CN variants and SNPs in 3 fungal**  
759 **species.** (A) SNPs per kb is not significantly correlated with CN variable base pairs per kb in *S.*  
760 *cerevisiae* wine strains (blue;  $r_s = 0.02$ ;  $p = 0.78$ ; Spearman rank correlation) and *C. deuterogattii*

761 (red;  $r_s = 0.06$ ;  $p = 0.62$ ; Spearman rank correlation); the reverse is true in *S. pombe* (green;  $r_s =$   
762  $0.67$ ;  $p < 0.01$ ; Spearman rank correlation). (b, left) CN variable base pairs per kb in wine strains  
763 of *S. cerevisiae* is greater than *C. deuterogattii* and *S. pombe* ( $p < 0.01$ ; Kruskal-Wallis and  $p <$   
764  $0.01$  for all Dunn's test pairwise comparisons with Benjamini-Hochberg multi-test correction).  
765 (b, right) SNPs per kb is low among *S. cerevisiae* wine strains (*Scer*) compared to *S. pombe*  
766 (*Spom*) but greater than a clonally expanded population of *C. deuterogattii* (*Cdeu*) ( $p < 0.01$ ;  
767 Kruskal-Wallis and  $p < 0.01$  for all Dunn's test pairwise comparisons with Benjamini-Hochberg  
768 multi-test correction). Data from Jeffares et al., 2015, 2017 (*Spom*); Steenwyk et al., 2016  
769 (*Cdeu*); Steenwyk and Rokas, 2017 (*Scer*).

770

771 **Figure 5. CN variable genes that affect functions important to wine making.** Functional  
772 categories (e.g., Cu and Fe homeostasis, maltose metabolism, etc.) are shown in black font.  
773 Genes of interest are shown proximal to the category described and are colored blue, red, or  
774 purple to represent a gene observed to be primarily deleted, duplicated, or both across  
775 populations and studies investigating *S. cerevisiae* wine strains. Genes found to be both  
776 duplicated and deleted present an opportunity for oenologists to capitalize on standing genetic  
777 diversity to select for particular flavor profiles or yeast performance.

778

779 **Box 1.** Standard population genetic principles of shifts in allele frequencies (Felsenstein, 1976;  
780 Moritz, 1994) can be applied to CN variants. To illustrate the case, we provide an example using  
781 the *CUPI* locus, where high CN provides protection against copper poisoning (Fogel and Welch,  
782 1982), of how the allele frequency of a CN variant can increase through its phenotypic effect.  
783 Suppose that in a yeast population exposed to copper that all individuals do not harbor CN

784 variation at the *CUPI* locus. Through a mutational event, a beneficial *CUPI* allele that contains  
785 two or more copies of the locus may appear in the population. (a) Yeast with two or more copies  
786 of *CUPI*, which in turn lead to higher *CUPI* protein levels, will be better and more efficient at  
787 copper sequestration unlike the parental allele and therefore avoiding copper poisoning (Fogel  
788 and Welch, 1982). (b) Assuming a large population size and strong positive selection, changes in  
789 allele frequency will occur in the population due to changes in yeast survivability and ability to  
790 propagate. More specifically, the frequency of the beneficial allele (i.e., *CUPI* duplications) will  
791 increase depending on the strength of selection, which increases as the concentration of  
792 environmental copper increases, and the parental allele will decrease.

Figure 1

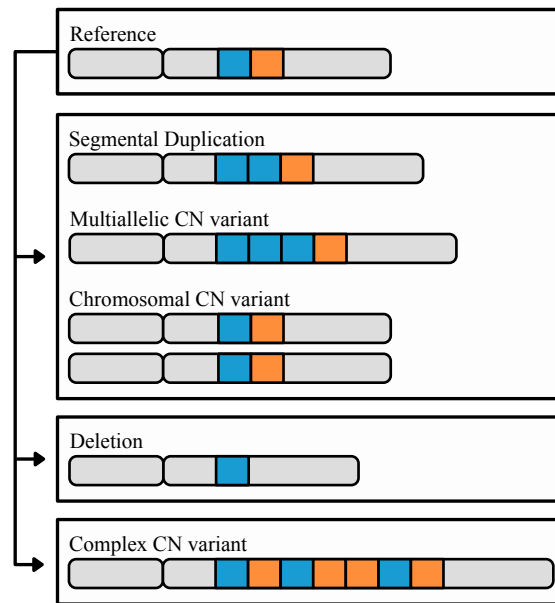



Figure 2

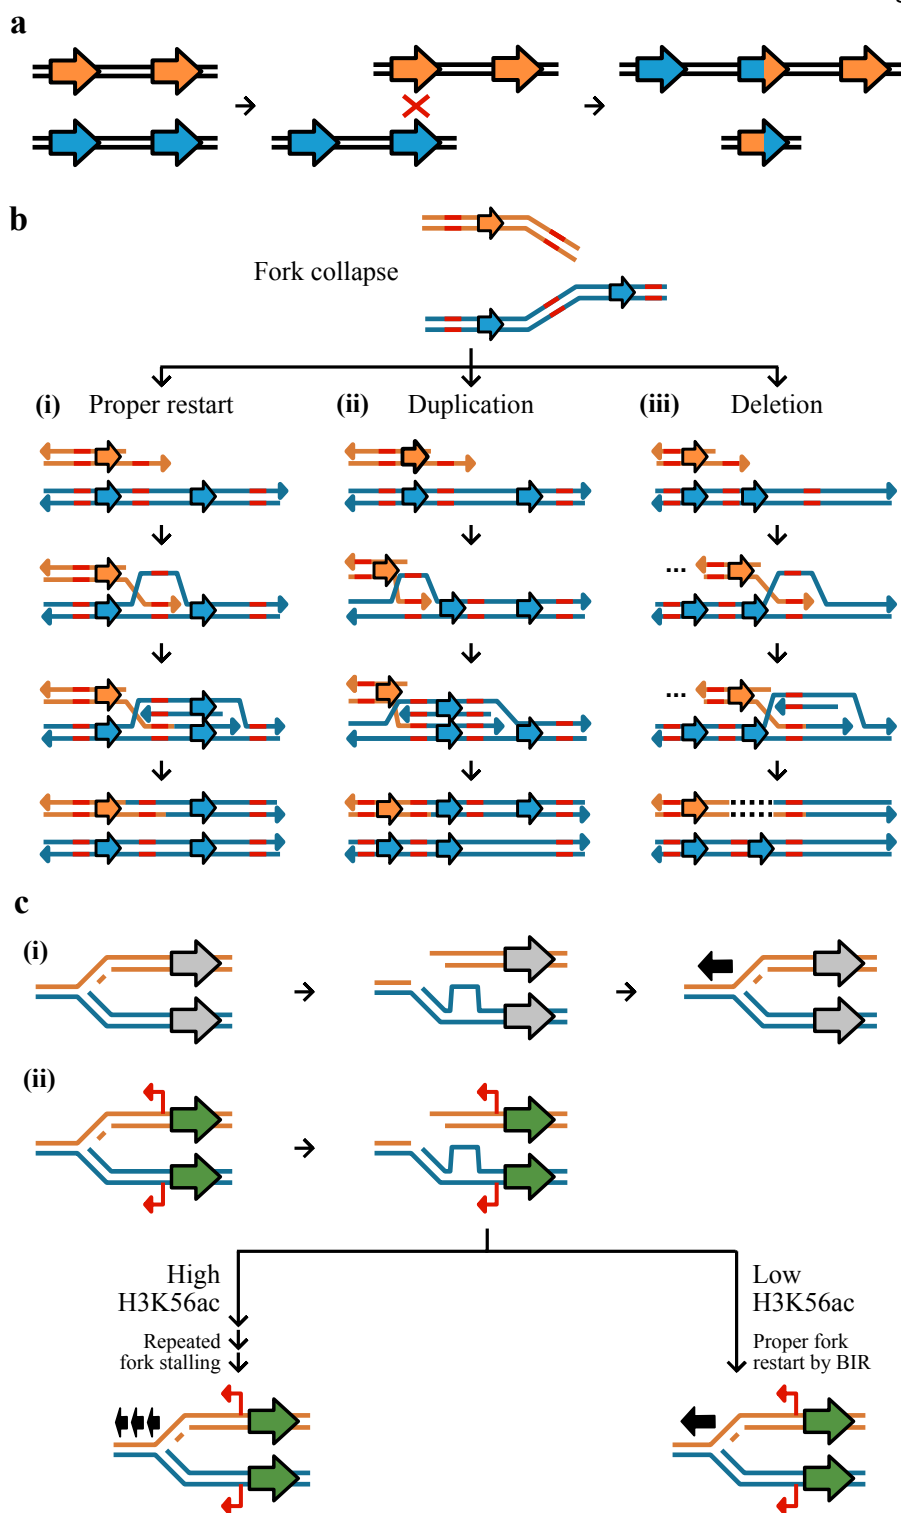

Figure 3

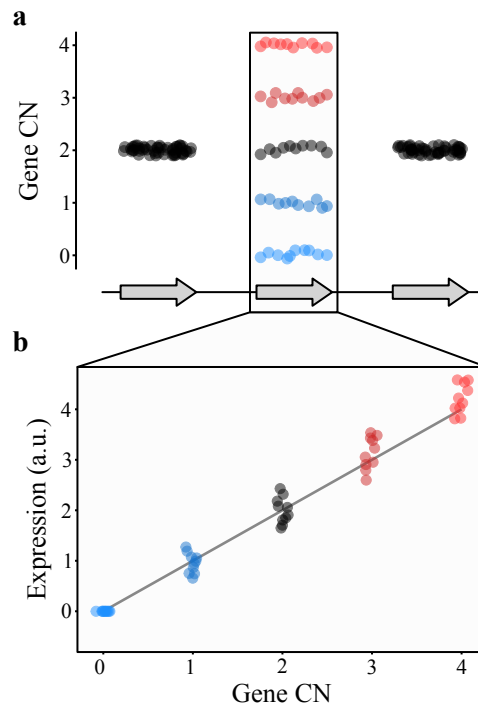

Figure 4

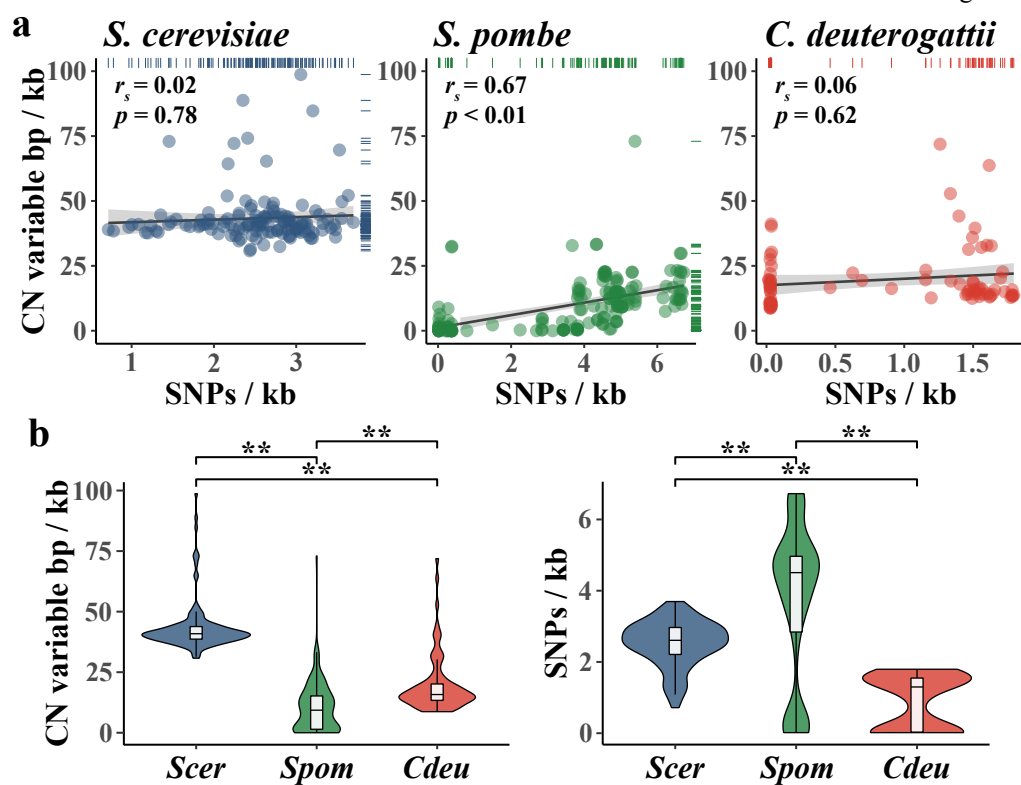

Figure 5

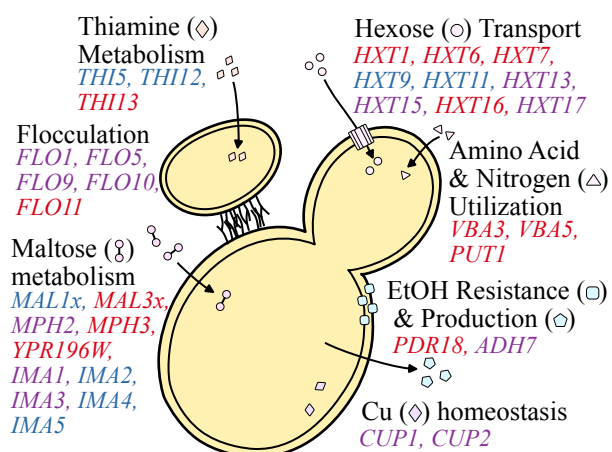

Figure within Box 1

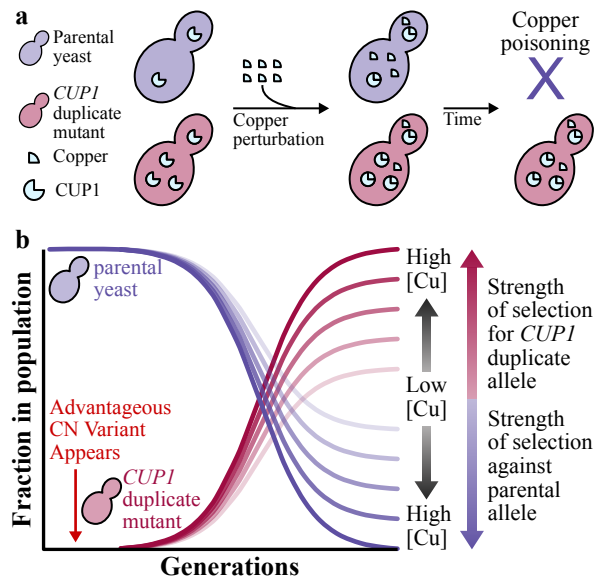

Source: https://www.biorxiv.org/content/10.1101/233122v1.full.pdf
